# Supplementary material for: Coping and Observed Emotions in Children of Parents with a History of Depression
Source: Springer Nature journal article supplement (doi:10.1007/s10826-019-01390-z), 2019-04-19
Supplement: MOESM1 [file 16666642]

| Table 11.  *Regression analyses predicting observed sadness during the stressful interaction task (current vs. past MDE)* | | | | | | | | | |
| --- | --- | --- | --- | --- | --- | --- | --- | --- | --- |
| Families of mothers with single major depressive episode (*N* = 21) | | | | | | Families of mothers with recurrent depression (*N* = 134) | | | |
|  | Sadness (Task 2) | | Task 2 SD Controlling for Task 1 SD | | | Sadness (Task 2) | | Task 2 SD Controlling for Task 1 SD | |
|  | *β* | *t* | *β* | | *t* | *β* | *t* | *β* | *t* |
| Task 1 SD | --- | --- | .53 | | 2.03+ | --- | --- | .37 | 4.31*** |
| Child PCC | -.31 | -.71 | -.10 | | -.25 | .04 | .30 | .03 | .29 |
| Child SCC | -.07 | -.22 | -.17 | | -.63 | -.05 | -.56 | -.08 | -.86 |
| Child DC | -.52 | -1.30 | -.52 | | -1.45 | -.07 | -.54 | -.08 | -.71 |
| BDI-II | -.07 | -.25 | .11 | | .42 | -.02 | -.26 | -.07 | -.74 |
| Child Gender | -.13 | -.46 | -.14 | | -.56 | -.04 | -.38 | -.03 | -.39 |
|  | Model Adjusted R2 = -.20 | | | Model Adjusted R2 = .03 | | Model Adjusted R2 = -.03 | | Model Adjusted R2 = .10 | |
| *Note.*  Task 2 = Stressful interaction task; Observed Mood (Task 1) = Observed mood during the pleasant activity interaction task for each dependent variable; PCC = Primary Control Coping; SCC = Secondary Control Coping; DC = Disengagement Coping; BDI-II = Beck Depression Inventory-II. The association between Task 1 SD and Task 2 SD remained significant following Bonferroni correction.  +*p* < .10 ** *p* < .01. | | | | | | | | | |
