# Supplementary material for: Coping and Observed Emotions in Children of Parents with a History of Depression
Source: Springer Nature journal article supplement (doi:10.1007/s10826-019-01390-z), 2019-04-19
Supplement: MOESM4 [file 16666642]

| Table 10.  *Regression analyses predicting observed sadness during the stressful interaction task (current vs. past MDE)* | | | | | | | | | |
| --- | --- | --- | --- | --- | --- | --- | --- | --- | --- |
| Families of mothers with current MDD (*N* = 43) | | | | | | Families of mothers with past MDD (*N* = 117) | | | |
|  | Sadness (Task 2) | | Task 2 SD Controlling for Task 1 SD | | | Sadness (Task 2) | | Task 2 SD Controlling for Task 1 SD | |
|  | *β* | *t* | *β* | | *t* | *β* | *t* | *β* | *t* |
| Task 1 SD | --- | --- | .56 | | 3.73*** | --- | --- | .25 | 2.54* |
| Child PCC | .12 | .54 | .05 | | .26 | -.03 | ..26 | -.02 | -.17 |
| Child SCC | -.15 | -.88 | -.24 | | -1.60 | -.03 | -.27 | -.04 | -.41 |
| Child DC | -.16 | -.71 | -.25 | | -1.24 | -.03 | -.23 | -.06 | -.50 |
| BDI-II | .10 | .60 | -.10 | | -.65 | -.18 | -1.78+ | -.15 | -1.50 |
| Child Gender | .04 | .21 | -.01 | | -.07 | -.08 | -.83 | -.06 | .65 |
|  | Model Adjusted R2 = -.06 | | | Model Adjusted R2 = .24 | | Model Adjusted R2 = -.01 | | Model Adjusted R2 = .04 | |
| *Note.*  Task 2 = Stressful interaction task; Observed Mood (Task 1) = Observed mood during the pleasant activity interaction task for each dependent variable; PCC = Primary Control Coping; SCC = Secondary Control Coping; DC = Disengagement Coping; BDI-II = Beck Depression Inventory-II. The association between Task 1 SD and Task 2 SD remained significant following Bonferroni correction.  +*p* < .10 ***p* < .01 ****p* < .001. | | | | | | | | | |
